# Supplementary material for: Encouraging student-driven clinical research in Germany: the CHIR-Net SIGMA network
Source: PubMed Central journal article supplement — Innov Surg Sci. 2017 Nov 27;2(4):255–60. doi: 10.1515/iss-2017-0038 (PMC6754020; doi:10.1515/iss-2017-0038), 2017-11-27
Supplement: iss-2-20170038-s001.pdf [file iss-2-20170038-s001.pdf]

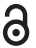

## Reviewer Assessment

Pia-Elena Frey<sup>a</sup>, Mirco Friedrich<sup>a</sup>, Lukas Rädeler<sup>a</sup>, Christoph A. Fink<sup>a</sup>, Alexander Leuck, Solveig Tenckhoff, Jens Neudecker and André L. Mihaljevic\*

# Encouraging student-driven clinical research in Germany: the CHIR-Net SIGMA network

<https://doi.org/10.1515/iss-2017-0038>

Received September 27, 2017; accepted November 2, 2017

\*Corresponding author: André L. Mihaljevic, Department of General, Visceral and Transplantation Surgery, University Hospital Heidelberg, Im Neuenheimer Feld 110, 69120 Heidelberg, Germany, E-mail: mihaljevic@uni-heidelberg.de

## Reviewers' Comments to Original Submission

### Reviewer 1: anonymous

Oct 24, 2017

|                                                                   |                 |
|-------------------------------------------------------------------|-----------------|
| <b>Reviewer Recommendation Term:</b>                              | Accept          |
| <b>Overall Reviewer Manuscript Rating:</b>                        | 100             |
| <b>Custom Review Questions</b>                                    | <b>Response</b> |
| Is the subject area appropriate for you?                          | 5 - High/Yes    |
| Does the title clearly reflect the paper's content?               | 5 - High/Yes    |
| Does the abstract clearly reflect the paper's content?            | 5 - High/Yes    |
| Do the keywords clearly reflect the paper's content?              | 5 - High/Yes    |
| Does the introduction present the problem clearly?                | 5 - High/Yes    |
| Are the results/conclusions justified?                            | 5 - High/Yes    |
| How comprehensive and up-to-date is the subject matter presented? | 5 - High/Yes    |
| How adequate is the data presentation?                            | 5 - High/Yes    |
| Are units and terminology used correctly?                         | 5 - High/Yes    |
| Is the number of cases adequate?                                  | 5 - High/Yes    |
| Are the experimental methods/clinical studies adequate?           | 5 - High/Yes    |
| Is the length appropriate in relation to the content?             | 5 - High/Yes    |
| Does the reader get new insights from the article?                | 5 - High/Yes    |
| Please rate the practical significance.                           | 5 - High/Yes    |
| Please rate the accuracy of methods.                              | 5 - High/Yes    |
| Please rate the statistical evaluation and quality control.       | 5 - High/Yes    |
| Please rate the appropriateness of the figures and tables.        | 5 - High/Yes    |
| Please rate the appropriateness of the references.                | 5 - High/Yes    |
| Please evaluate the writing style and use of language.            | 5 - High/Yes    |
| Please judge the overall scientific quality of the manuscript.    | 5 - High/Yes    |
| Are you willing to review the revision of this manuscript?        | Yes             |

### Comments to Authors:

In this well-written article, the authors describe the objectives and the infrastructure of CHIR-NET Sigma as a student-driven multicenter research network, enabling medical students to contribute to clinical trials.

This initiative is highly appreciated, urgently needed and just timely. Congratulations to all being responsible for this new structure.

**Reviewer 2: anonymous**

Nov 02, 2017

---

|                                                                   |                 |
|-------------------------------------------------------------------|-----------------|
| <b>Reviewer Recommendation Term:</b>                              | Accept          |
| <b>Overall Reviewer Manuscript Rating:</b>                        | 80              |
| <b>Custom Review Questions</b>                                    | <b>Response</b> |
| Is the subject area appropriate for you?                          | 5 - High/Yes    |
| Does the title clearly reflect the paper's content?               | 5 - High/Yes    |
| Does the abstract clearly reflect the paper's content?            | 4               |
| Do the keywords clearly reflect the paper's content?              | 4               |
| Does the introduction present the problem clearly?                | 5 - High/Yes    |
| Are the results/conclusions justified?                            | 5 - High/Yes    |
| How comprehensive and up-to-date is the subject matter presented? | 4               |
| How adequate is the data presentation?                            | 4               |
| Are units and terminology used correctly?                         | 4               |
| Is the number of cases adequate?                                  | N/A             |
| Are the experimental methods/clinical studies adequate?           | N/A             |
| Is the length appropriate in relation to the content?             | 4               |
| Does the reader get new insights from the article?                | 5 - High/Yes    |
| Please rate the practical significance.                           | 5 - High/Yes    |
| Please rate the accuracy of methods.                              | N/A             |
| Please rate the statistical evaluation and quality control.       | N/A             |
| Please rate the appropriateness of the figures and tables.        | 5 - High/Yes    |
| Please rate the appropriateness of the references.                | 4               |
| Please evaluate the writing style and use of language.            | 4               |
| Please judge the overall scientific quality of the manuscript.    | 4               |
| Are you willing to review the revision of this manuscript?        | Yes             |

**Comments to Authors:**

This is a really nice paper which clearly reflects the importance of teaching students and young residents in performing clinical trials. Clinical trials are a very important part of our every day work. So it is a good practice to build up a network for training and education of medical students in important principals of clinical trials as well it is a good and easy way to perform prospective clinical trials with a large number of patients included in the trial.

The paper is well structured and the reader gets a good overview of the structure and organisation of SIGMA and CHIR-net SIGMA.

---
